# Supplementary material for: A high-energy, full concentration-gradient cathode material with excellent cycle and thermal stability for lithium ion batteries
Source: Royal Society of Chemistry journal article supplement (doi:10.1039/c4ta03158j), 2014-01-01
Supplement: c4ta03158j1.pdf [file c4ta03158j1.pdf]

## High-energy, full concentration-gradient cathode material with excellent cycle and thermal stability for lithium ion batteries

P. Y. Hou, L. Q. Zhang and X. P. Gao

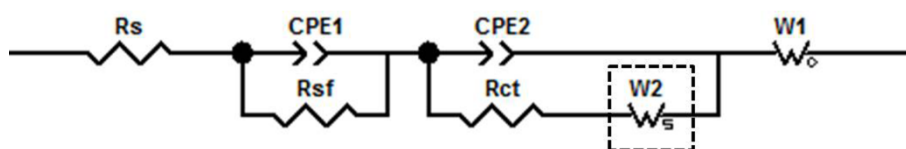

Fig. S1. Equivalent circuits used to fit the experimental data.  $R_s$  is solution resistance,  $R_{sf}$  is surface film resistance,  $R_{ct}$  is charge-transfer resistance, CPE and CPE1 are the constant phase element,  $W_s$  and  $W_o$  are assigned to the finite Nernst diffusion impedance in the thin film and semi-infinite Warburg diffusion impedance in the bulk, respectively.

Table S1. The simulated results from electrochemical impedance spectra of the full concentration-gradient and normal  $\text{LiNi}_{0.6}\text{Co}_{0.2}\text{Mn}_{0.2}\text{O}_2$  electrodes after different cycles in the potential range of 3.0-4.4 V at 55 °C.

| Sample                                                                                         | Cycle | $R_{sf}$ ( $\Omega$ ) | $R_{ct}$ ( $\Omega$ ) | $W_s$ ( $\Omega$ ) | $W_o$ ( $\Omega$ ) |
|------------------------------------------------------------------------------------------------|-------|-----------------------|-----------------------|--------------------|--------------------|
| Normal<br>$\text{LiNi}_{0.6}\text{Co}_{0.2}\text{Mn}_{0.2}\text{O}_2$                          | 0     | 39.78                 | 428.6                 | -                  | 348.5              |
|                                                                                                | 50th  | 22.61                 | 39.29                 | 106.6              | 1.69               |
|                                                                                                | 100th | 29.34                 | 49.32                 | 236.7              | 2.16               |
| Full concentration-<br>gradient<br>$\text{LiNi}_{0.6}\text{Co}_{0.2}\text{Mn}_{0.2}\text{O}_2$ | 0     | 17.7                  | 293.9                 | -                  | 377.2              |
|                                                                                                | 50th  | 7.12                  | 10.94                 | -                  | 1.28               |
|                                                                                                | 100th | 17.45                 | 28.95                 | -                  | 4.35               |
